# Supplementary material for: Delivery of Lipid Nanoparticles Containing small interfering RNA Targeting Transmembrane Serine Protease 4 in a human gastric cancer model using nude mice
Source: Research Square preprint supplement (doi:10.21203/rs.3.rs-7287079/v1), 2025-09-30
Supplement: Supplementary file 1 [file b40599e71e40102a9f5f5fec.pdf]

## Supplementary Figure S1.

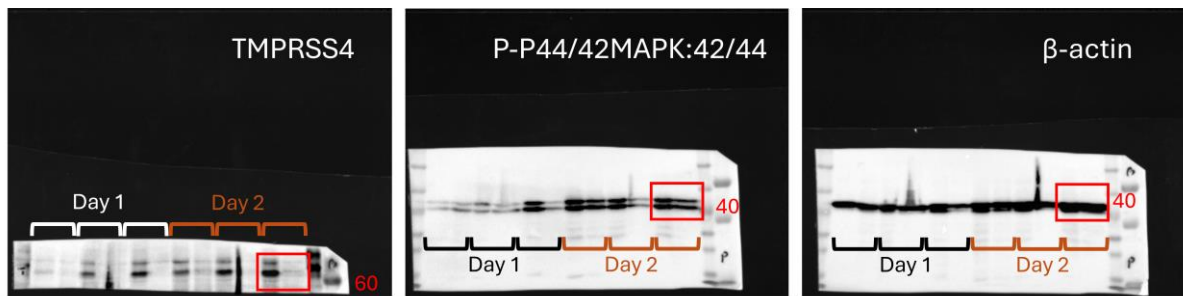

*In vitro* silencing of transmembrane serine protease 4 (TMPRSS4) suppresses ERK1/2 signal in NUGC-3 gastric cancer cells. We observed NUGC3 day 1 and day 2 after transfected with TMPRSS4-siRNA. Full-length of western blot comparing TMPRSS4, phospho-p44/42MAPK, p44/42MAPK, and  $\beta$ -actin. The red-lined area is the part used in Figure 1a.

**Supplementary Figure S2.**

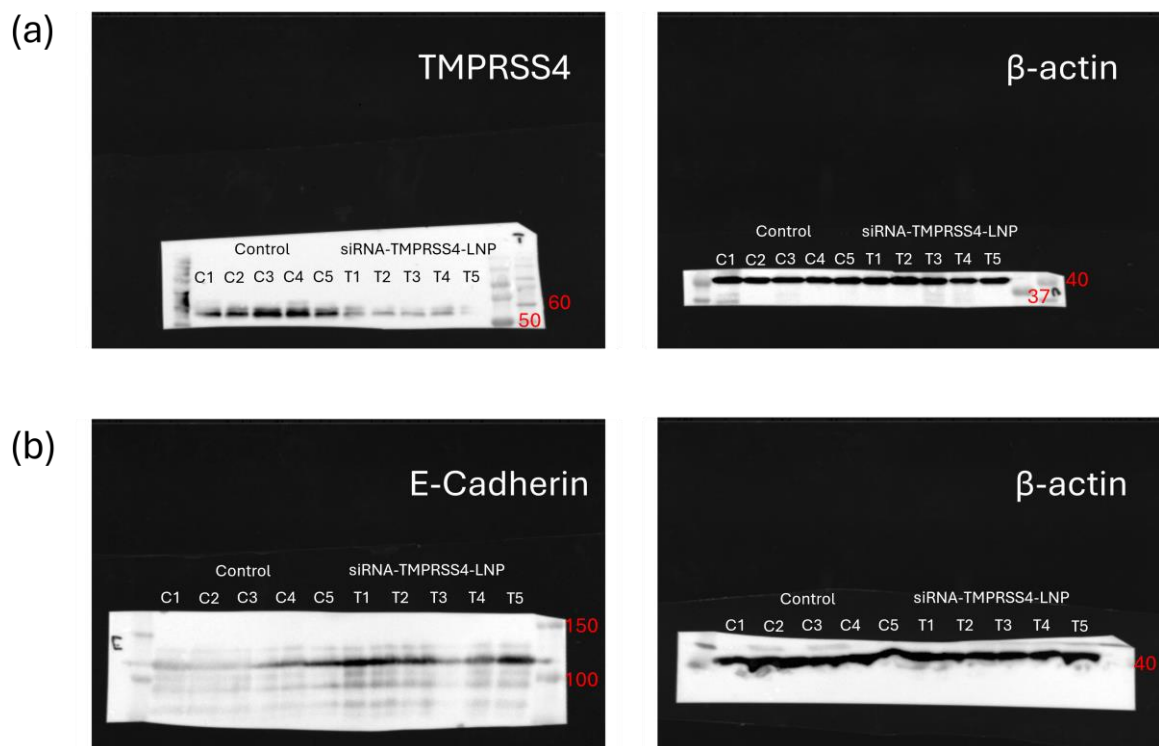

**High dose of small interfering (si)-transmembrane serine protease 4 (TMPRSS4)-lipid nanoparticle in combination with fluorouracil suppressed the expression of TMPRSS-4 in tumors and enhanced the expression of E-cadherin in tumor *in vivo*.** a. Full-length of western blotting comparing TMPRSS4 and  $\beta$ -actin. b. Full-length of western blotting comparing E-cadherin and  $\beta$ -actin.
